# Supplementary material for: Ligand exchange induced crystal structure and morphology evolution of copper–tin–sulfur binary and ternary compounds
Source: Royal Society of Chemistry journal article supplement (doi:10.1039/d4dt00309h), 2024-01-01
Supplement: d4dt00309h1.pdf [file d4dt00309h1.pdf]

Supporting Information

Ligand Exchange Induced Crystal Structure and Morphology Evolution of Copper-Tin-Sulfur Binary and Ternary Compounds

Suqin Chen, # Ying Xu, # Yangyang Weng, Pengfei Lou, Xiaoyan Zhang\*, Ningzhong Bao\*

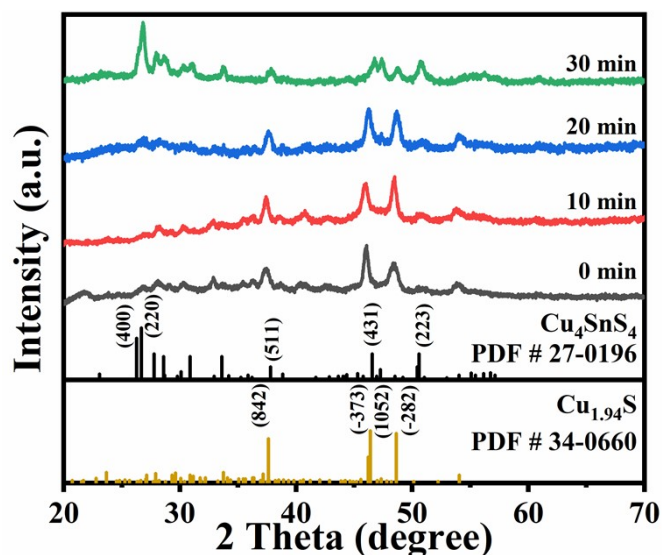

Fig. S1 XRD patterns of products reacted at 230 °C for different reaction times of 0-30 min.

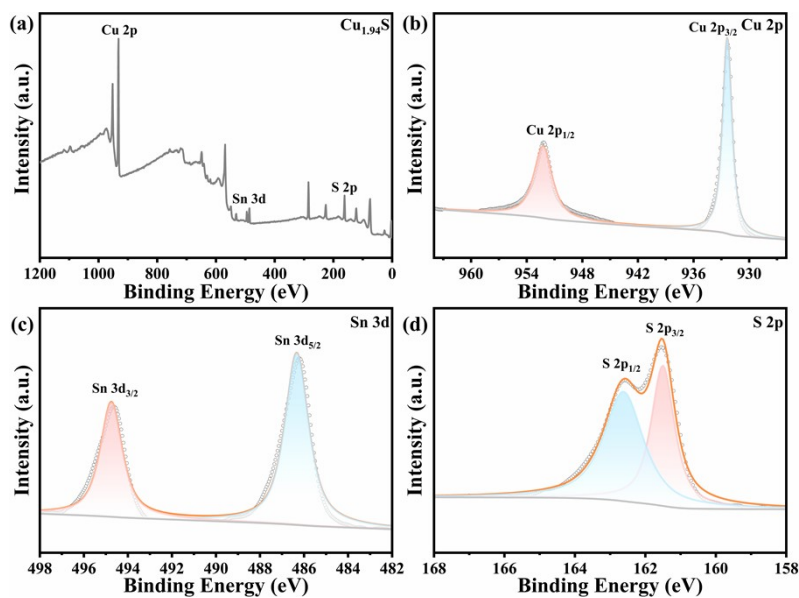

Fig. S2 XPS spectra of  $\text{Cu}_{1.94}\text{S}$  composites: (a) survey spectrum, (b) Cu2p region, (c) Sn3d region and (d) S2p region.

**Table S1** The ICP result for FA and  $(\text{NH}_4)_2\text{S}$  solution after LE

| Element | Volume<br>V (mL) | Constant volume<br>$V_0$ (mL) | Concentration<br>$C_0$ (mg/L) | Original Concentration<br>$C_1$ (mg/L) |
|---------|------------------|-------------------------------|-------------------------------|----------------------------------------|
| Cu      | 2                | 10                            | 8.683                         | 43.4                                   |
